# Supplementary material for: Structural and Socio-Spatial Determinants Influencing Care and Survival of Patients with a Pancreatic Adenocarcinoma: Results of the PANDAURA Cohort
Source: MDPI journal article supplement (doi:10.3390/cancers14215413), 2022-11-03
Supplement: s1 [file s1]

**Table S1.** Overall survival univariate analysis in the global cohort.

| Variables                                                           |                             | n   | HR    | IC95        | p-value |
|---------------------------------------------------------------------|-----------------------------|-----|-------|-------------|---------|
| Clinical characteristics                                            |                             |     |       |             |         |
| Sex                                                                 | Female                      | 536 | 0.970 | [0.81-1.16] | 0.7331  |
|                                                                     | Male                        |     |       |             |         |
| Age                                                                 | Median                      | 536 | 1.024 | [1.02-1.03] | <0.0001 |
|                                                                     | ≤ 70                        | 536 |       |             | 0.0001  |
|                                                                     | > 70                        |     | 1.408 | [1.18-1.68] |         |
| BMI                                                                 | < 20                        | 536 |       |             | 0.3196  |
|                                                                     | [20-24]                     |     | 0.789 | [0.59-1.06] |         |
|                                                                     | [25-29]                     |     | 0.911 | [0.67-1.24] |         |
|                                                                     | ≥ 30                        |     | 0.827 | [0.58-1.17] |         |
| Smoking status                                                      | No smoking                  | 536 |       |             | 0.0849  |
|                                                                     | Weaned smoking              |     | 0.837 | [0.66-1.06] |         |
|                                                                     | Active smoking              |     | 0.782 | [0.61-1.01] |         |
| History of other cancer                                             | No                          | 536 |       |             | 0.3777  |
|                                                                     | Yes                         |     | 1.116 | [0.87-1.42] |         |
| Presence of diabetes                                                | No                          | 536 |       |             | 0.6624  |
|                                                                     | Yes                         |     | 1.044 | [0.86-1.26] |         |
| Circumstances of cancer diagnosis                                   | Incidental                  | 536 | 0.786 | [0.59-1.05] | 0.1069  |
|                                                                     | Presence of symptoms        |     |       |             |         |
| Stage at the diagnosis                                              | Resectable                  | 536 |       |             | <0.0001 |
|                                                                     | Borderline/locally advanced |     | 1.733 | [1.36-2.21] |         |
|                                                                     | Metastatic                  |     | 5.726 | [4.41-7.44] |         |
| Histological grade                                                  | Well differentiated         | 305 |       |             | 0.0170  |
|                                                                     | Moderately differentiated   |     | 1.318 | [1.00-1.74] |         |
|                                                                     | Poorly differentiated       |     | 1.697 | [1.17-2.45] |         |
| Delay between onset symptoms and first CT scan (days)               | ≤ 15                        | 478 |       |             | 0.29    |
|                                                                     | > 15                        |     | 1.159 | [0.97-1.39] |         |
| Delay between CT scan and first treatment (days)*                   | All-treated patients        | 436 |       |             | <0.0001 |
|                                                                     | ≤ 21                        |     |       |             |         |
|                                                                     | > 21                        |     | 0.534 | [0.44-0.65] |         |
|                                                                     | Metastatic subgroup         | 131 |       |             | 0.0085  |
|                                                                     | ≤ 21                        |     | 2.02  | [1.18-3.45] |         |
|                                                                     | > 21                        |     |       |             |         |
|                                                                     | Resectable subgroup         | 115 |       |             | 0.8470  |
|                                                                     | ≤ 21                        |     | 0.95  | [0.58-1.56] |         |
| > 21                                                                |                             |     |       |             |         |
| Surgical features                                                   |                             |     |       |             |         |
| Resection margins status                                            | R0                          | 146 |       |             | 0.5125  |
|                                                                     | R1                          |     | 1.175 | [0.73-1.90] |         |
| Surgery-related adverse events                                      | No                          | 179 |       |             | 0.6989  |
|                                                                     | Yes                         |     | 1.068 | [0.77-1.49] |         |
| Number of pancreatic surgeries per center per year                  | < 5                         | 177 | 2.020 | [1.23-3.33] | 0.0180  |
|                                                                     | 5 - 20                      |     | 1.306 | [0.92-1.85] |         |
|                                                                     | > 20                        |     |       |             |         |
| Number of cancer surgeries (all types included) per center per year | ≤ 100                       | 177 | 1.150 | [0.69-1.91] | 0.5871  |
|                                                                     | > 100                       |     |       |             |         |
| Socio-spatial determinants                                          |                             |     |       |             |         |
| Localized Potential Accessibility                                   | ≤ 46.7                      | 536 | 1.005 | [0.76-1.33] | 0.1368  |
|                                                                     | [46.8 ; 63.8]               |     | 1.371 | [1.04-1.81] |         |
|                                                                     | [63.9 ; 74.3]               |     | 1.199 | [0.91-1.57] |         |
|                                                                     | [74.4; 86.4]                |     | 1.109 | [0.83-1.48] |         |

|                                                                       |                                       |                  |       |             |
|-----------------------------------------------------------------------|---------------------------------------|------------------|-------|-------------|
|                                                                       |                                       | > 86.4           |       |             |
| <b>French deprivation index</b>                                       |                                       | ≤ -1.3           | 1.031 | [0.79-1.35] |
|                                                                       |                                       | [-1.2 ; -0.5]    | 0.728 | [0.55-0.96] |
|                                                                       |                                       | [-0.4 ; 0.3]     |       |             |
|                                                                       |                                       | [0.4 ; 1]        | 0.901 | [0.68-1.19] |
|                                                                       |                                       | > 1              | 0.877 | [0.67-1.15] |
| <b>Population density (people/km<sup>2</sup>)</b>                     |                                       | ≤ 83.7           |       |             |
|                                                                       |                                       | [83.8 ; 254.7]   | 0.983 | [0.75-1.30] |
|                                                                       |                                       | [254.8 ; 798.1]  | 0.870 | [0.66-1.15] |
|                                                                       |                                       | [798.2 ; 2159.9] | 1.044 | [0.79-1.38] |
|                                                                       |                                       | > 2159.9         | 1.057 | [0.80-1.39] |
| <b>GeoClasH classification</b>                                        | Wealthy Metropolitan Areas areas      |                  |       |             |
|                                                                       | Precarious Population Districts areas |                  | 0.871 | [0.70-1.08] |
|                                                                       | Residential Outskirts                 |                  | 0.986 | [0.74-1.31] |
|                                                                       | Agricultural and Industrial Plains    |                  | 0.973 | [0.58-1.64] |
|                                                                       |                                       | Rural Margins    | 1.008 | [0.72-1.40] |
| <b>Spatial accessibility (time travel to an expert center in min)</b> |                                       | ≤ 13             |       |             |
|                                                                       |                                       | [14 ; 36]        | 0.773 | [0.59-1.02] |
|                                                                       |                                       | [37 ; 58]        | 0.879 | [0.67-1.15] |
|                                                                       |                                       | [59 ; 79]        | 0.906 | [0.69-1.18] |
|                                                                       |                                       | > 79             | 0.755 | [0.57-0.99] |

*P*-values < 0.05 are marked in bold characters. \* Delay between CT scan and first treatment (days) is only analysed in treated patients excluding exclusive best supportive care (n=438). Abbreviations: BMI= body mass index; n: number of patients with data available for analysis.

**Table S2.** Impact of clinical features and delay on overall survival in the treated cohort after multivariate analyses. Final multivariate model including 431 patients (exclusion of patients with exclusive best supportive care).

| Variables                                | Value                       | HR    | IC95        | <i>p</i> -value |
|------------------------------------------|-----------------------------|-------|-------------|-----------------|
| <b>BMI</b>                               | <20                         |       |             | NS(1)           |
|                                          | [20-24]                     |       |             |                 |
|                                          | [25-29]                     |       |             |                 |
| <b>Age (years)</b>                       | ≥ 30                        |       |             | 0.0011          |
|                                          | ≤ 70                        |       |             |                 |
|                                          | >70                         | 1.392 | [1.14-1.70] |                 |
| <b>Circumstances of cancer diagnosis</b> | Incidental diagnosis        |       |             | 0.0116          |
|                                          | Presence of symptoms        | 1.545 | [1.10-2.17] |                 |
| <b>Presence of diabetes</b>              | No                          |       |             | NS(3)           |
|                                          | Yes                         |       |             |                 |
| <b>Sex</b>                               | Female                      |       |             | NS(2)           |
|                                          | Male                        |       |             |                 |
| <b>Stage at the diagnosis</b>            | Resectable                  |       |             | <0.0001         |
|                                          | Borderline/locally advanced | 1.701 | [1.31-2.19] |                 |
|                                          | Metastatic                  | 5.344 | [3.99-7.16] |                 |
| <b>Delay CT-Scan – first treatment</b>   | ≤ 21 days                   |       |             | 0.4220          |
|                                          | > 21 days                   | 0.884 | [0.66-1.19] |                 |

The number presented between parenthesis in the *p*-value column corresponds to the rank of the variable (rank) in the multivariate analysis based on its *p*-value. *P*-values < 0.05 are marked in bold characters. Abbreviations: BMI= body mass index

**Table S3.** Surgery-related adverse events and mortality according to volume of pancreatic surgery per center.

|                                    | Number of surgeries per center per year |         |                      |         |                     |         |                     |         | All                  |         | Test        |
|------------------------------------|-----------------------------------------|---------|----------------------|---------|---------------------|---------|---------------------|---------|----------------------|---------|-------------|
|                                    | Missing data                            |         | 5-20                 |         | <5                  |         | >20                 |         |                      |         |             |
|                                    | N=3                                     |         | N=69                 |         | N=21                |         | N=88                |         | N=181                |         |             |
| Surgery-related adverse events     |                                         |         |                      |         |                     |         |                     |         |                      |         |             |
| Missing data                       | 0                                       |         | 1                    |         | 0                   |         | 0                   |         | 1                    |         | Chi-2       |
| No                                 | 2                                       | (66.7%) | 43                   | (63.2%) | 14                  | (66.7%) | 58                  | (65.9%) | 117                  | (65.0%) | $P = 0.927$ |
| Yes                                | 1                                       | (33.3%) | 25                   | (36.8%) | 7                   | (33.3%) | 30                  | (34.1%) | 63                   | (35.0%) |             |
| Duration of hospitalization (days) |                                         |         |                      |         |                     |         |                     |         |                      |         |             |
| N                                  | 3                                       |         | 69                   |         | 21                  |         | 88                  |         | 181                  |         | Kruskal-    |
| Mean (SD)                          | 19.67 (7.51)                            |         | 18.29 (15.66)        |         | 16.10 (12.08)       |         | 16.32 (8.76)        |         | 17.10 (12.15)        |         | Wallis      |
| Median (min; max)                  | 20.00 (12.00; 27.00)                    |         | 14.00 (3.00; 116.00) |         | 13.00 (3.00; 58.00) |         | 15.00 (2.00; 58.00) |         | 14.00 (2.00; 116.00) |         | $P = 0.657$ |
|                                    | )                                       |         | )                    |         | )                   |         | )                   |         | )                    |         |             |
| IQR [Q1 - Q3]                      | [12.00 - 27.00]                         |         | [10.00 - 20.00]      |         | [10.00 - 17.00]     |         | [10.00 - 19.00]     |         | [10.00 - 20.00]      |         |             |
| Transfer in intensive care unit    |                                         |         |                      |         |                     |         |                     |         |                      |         |             |
| No                                 | 2                                       | (66.7%) | 57                   | (82.6%) | 16                  | (76.2%) | 77                  | (87.5%) | 152                  | (84.0%) | Chi-2       |
| Yes                                | 1                                       | (33.3%) | 12                   | (17.4%) | 5                   | (23.8%) | 11                  | (12.5%) | 29                   | (16.0%) | $P = 0.393$ |
| Death within 30 days after surgery |                                         |         |                      |         |                     |         |                     |         |                      |         |             |
|                                    | 0                                       | (0.0%)  | 3                    | (4.3%)  | 2                   | (9.5%)  | 1                   | (1.1%)  | 6                    | (3.3%)  | Fisher test |
|                                    |                                         |         |                      |         |                     |         |                     |         |                      |         | $P = 0.11$  |
